# Supplementary material for: Effect of Lactobacillus salivarius Bacteriocin Abp118 on the Mouse and Pig Intestinal Microbiota
Source: PLOS journal article supplement (doi:10.1371/journal.pone.0031113), 2012-02-17
Supplement: S1 (10.1371/journal.pone.0031113.s001) [file journal.pone.0031113.s001]

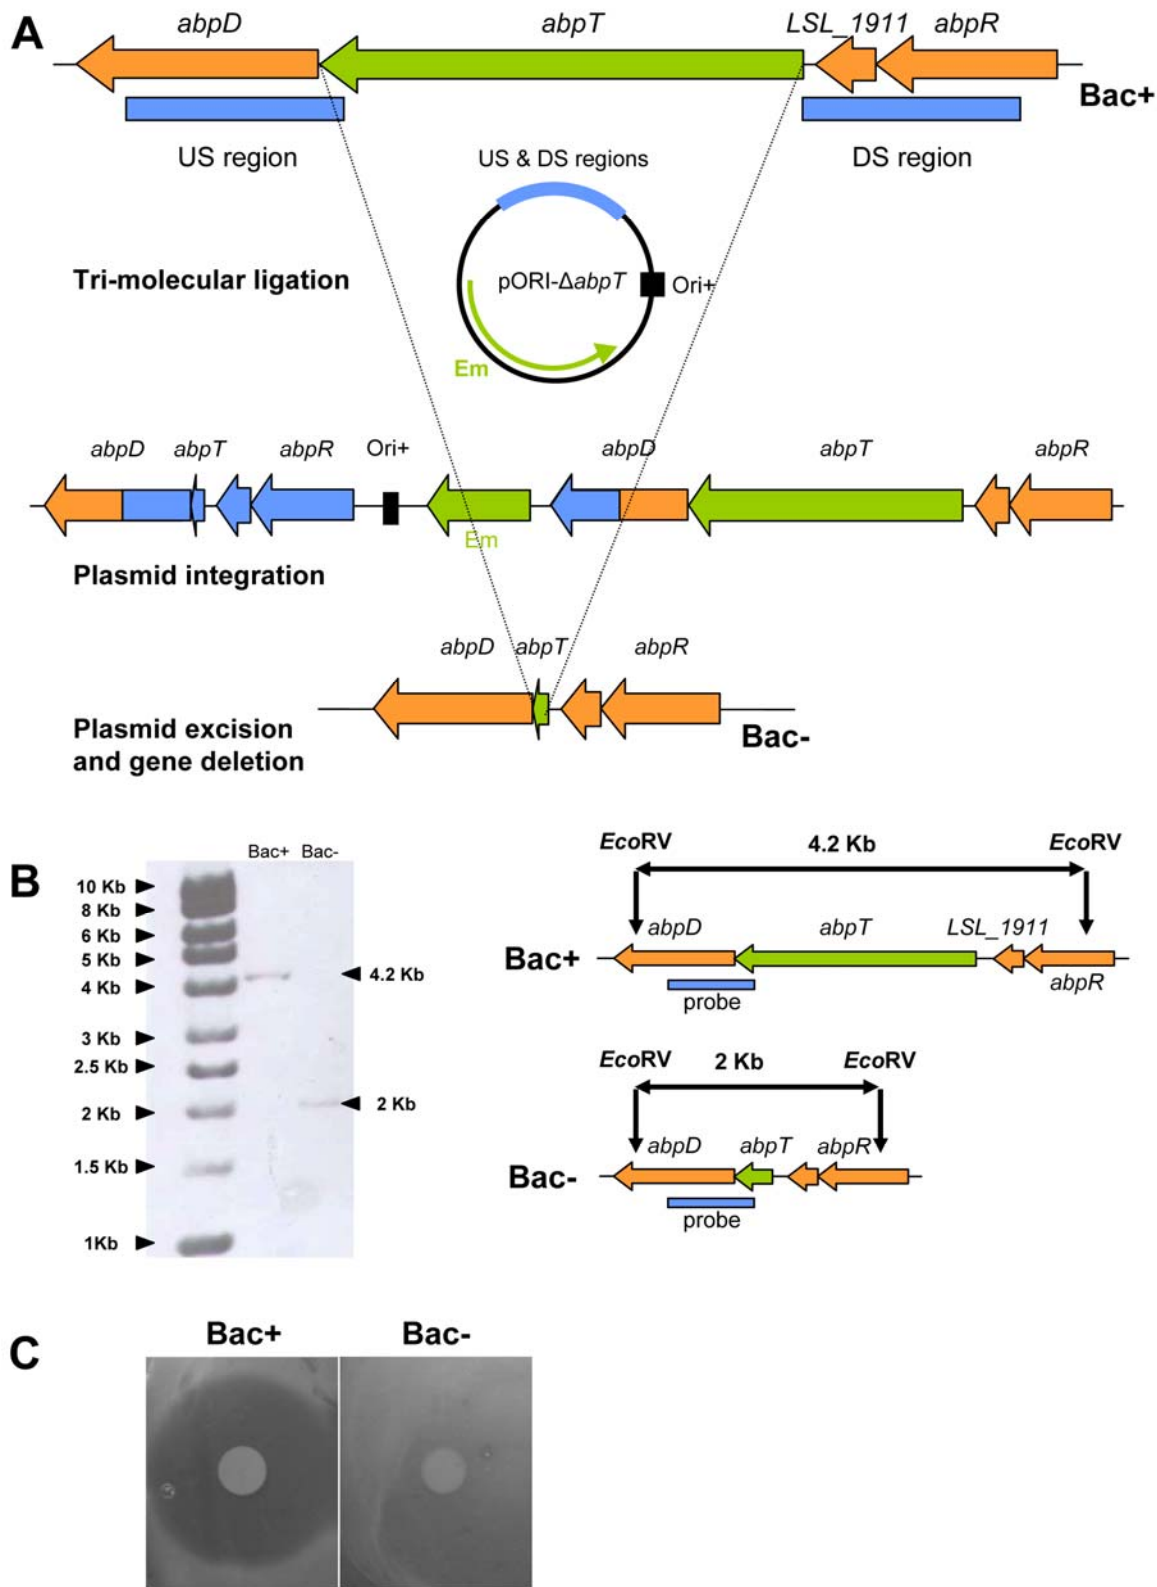

**Figure S1. Construction and confirmation of the *abpT* gene deletion in *L. salivarius* UCC118.** A) Schematic representation of the  $\Delta abpT$  mutant construction using the pORI19-pVE6007 system; see Materials and Methods for details. B) Confirmation of the *abpT* gene deletion by Southern hybridization. The 1 kb probe corresponds to the upper-region of the *abpT* gene. Expected lengths of genomic fragment recognized by the probe after digestion with *EcoRV* are shown. C) Bacteriocin production phenotype of UCC118 Bac<sup>+</sup> and Bac<sup>-</sup> strains using an overlay method. Presence of a halo indicates sensitivity of the indicator strain (*L. sakei*) to the tested strain and thus indicates if bacteriocin is produced or not.
