# Supplementary material for: Effect of Lactobacillus salivarius Bacteriocin Abp118 on the Mouse and Pig Intestinal Microbiota
Source: PLOS journal article supplement (doi:10.1371/journal.pone.0031113), 2012-02-17
Supplement: S4 (10.1371/journal.pone.0031113.s004) [file journal.pone.0031113.s004]

**Table S2: Primers used in this study.**

| Primer                         | Primer sequence <sup>(a)</sup> (5'-3')                                         | Use                                                   |
|--------------------------------|--------------------------------------------------------------------------------|-------------------------------------------------------|
| <i>abpT-US for</i>             | GATGGATCCGGTTT TAGATACGTTTCTAGTTAC                                             | cloning flanks of <i>abpT</i> in pORI <sub>19-1</sub> |
| <i>abpT-US rev</i>             | AGGGGGATTTTTCTTGTTAAGAAAGTATTTAGTTAATAGTTAGGGGGGAG                             | cloning flanks of <i>abpT</i> in pORI <sub>19-1</sub> |
| <i>abpT-DS for</i>             | AATACTCCCCCTAACTATTAATACTTTCTTAACAAGAAAAATCC                                   | cloning flanks of <i>abpT</i> in pORI <sub>19-1</sub> |
| <i>abpT-DS rev</i>             | CCGGAATTTCGAGCAGATAAAGATGGCATAG                                                | cloning flanks of <i>abpT</i> in pORI <sub>19-1</sub> |
| <i>abpT KO for</i>             | GGTTGGAACCTTAGAGTATTCCAG                                                       | verifying <i>abpT</i> deletion                        |
| <i>abpT KO rev</i>             | TCCTGCACCTTGGATAGTTATCTC                                                       | verifying <i>abpT</i> deletion                        |
| <i>V4 for-1</i> <sup>(b)</sup> | <u>CGTATCGCCTCCCTCGCGCCATCAG</u> ACGAGTGCGTAYTGGGYDTAAAGNG <sup>(d)</sup>      | amplifying V4 region of bacterial 16S rRNA gene       |
| <i>V4 rev</i> <sup>(b)</sup>   | <u>GCCTTGCCAGCCCGCTCAGTACNVGGGTATCTAATCC</u> <sup>(d)</sup>                    | amplifying V4 region of bacterial 16S rRNA gene       |
| <i>V4 for-2</i> <sup>(c)</sup> | <u>CCATCTCATCCCTGCGTGTCTCCGACTCAG</u> ACGAGTGCGTAYTGGGYDTAAAGNG <sup>(d)</sup> | amplifying V4-V5 region of bacterial 16S rRNA gene    |
| <i>V5 rev</i> <sup>(c)</sup>   | <u>CCTATCCCCTGTGTGCCTTGGCAGTCTCAGCCGTCAATTYTTTRAGTTT</u> <sup>(d)</sup>        | amplifying V4-V5 region of bacterial 16S rRNA gene    |

(a) From the annotated sequence of *L. salivarius* UCC118 [13].

(b) Primers used for the mouse trial pyrosequencing analysis.

(c) Primers used for the pig trial pyrosequencing analysis.

(d) Primers used for the pyrosequencing analysis. Each primer contains a sequence homologue to the V4 or V4-V5 region of the bacterial 16S rRNA gene and a 454 adaptor sequence (underlined) used for sequencing. Each forward primer contains in addition a barcode (in red) that was used to distinguish between each sample in the pool of amplicons (a total of 24 different barcodes were used in these studies).
